# Supplementary material for: Ultrathin CoOx-modified hematite with low onset potential for solar water oxidation
Source: Royal Society of Chemistry journal article supplement (doi:10.1039/c7cp01588g), 2017-01-01
Supplement: c7cp01588g1.pdf [file c7cp01588g1.pdf]

## Supporting Information

### Ultrathin CoO<sub>x</sub> Modified Hematite with Low Onset Potential for Solar Water Oxidation

*Chun Du,<sup>a</sup> Jun Wang,<sup>a</sup> Xiao Liu,<sup>b</sup> Jie Yang,<sup>a</sup> Kun Cao,<sup>b</sup> Yanwei Wen,<sup>a</sup> Rong Chen<sup>b,c,\*</sup> and Bin  
Shan<sup>a,d,\*</sup>*

<sup>a</sup>State Key Laboratory of Materials Processing and Die & Mould Technology, School of Materials Science and Engineering, Huazhong University of Science and Technology, Wuhan 430074, Hubei, People's Republic of China.

<sup>b</sup>State Key Laboratory of Digital Manufacturing Equipment and Technology, School of Mechanical Science and Engineering, Huazhong University of Science and Technology, Wuhan 430074, Hubei, People's Republic of China.

<sup>c</sup>School of Optical and Electronic Information, Huazhong University of Science and Technology, Wuhan 430074, Hubei, People's Republic of China.

<sup>d</sup>Department of Materials Science and Engineering, The University of Texas at Dallas, Richardson, Texas 75080, USA

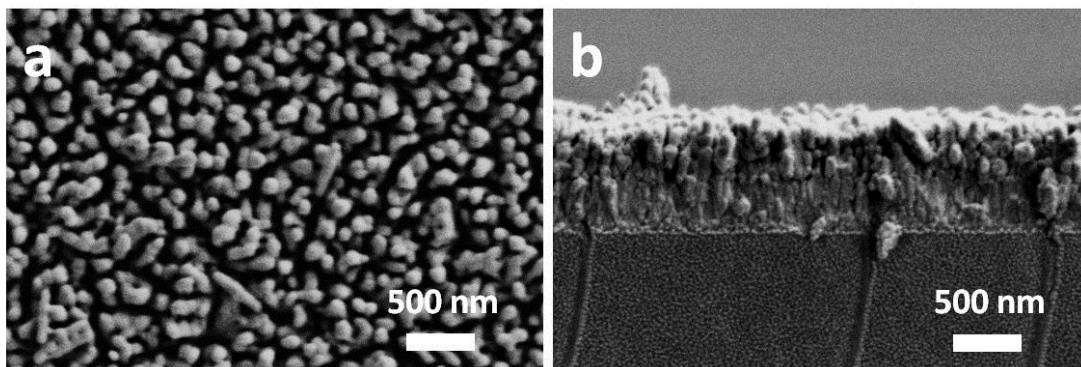

**Fig. S1.** Top-view (a) and side-view (b) SEM images of bare hematite nanostructured film. The scale bar is 500 nm.

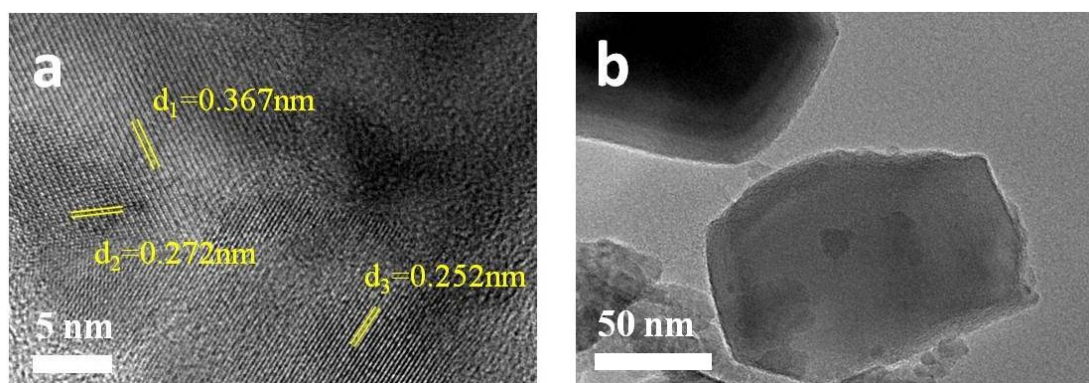

**Fig. S2.** (a) High-resolution TEM image of hematite with ALD  $\text{CoO}_x$  modification layer. (b) TEM image of single hematite nano-structure unit.

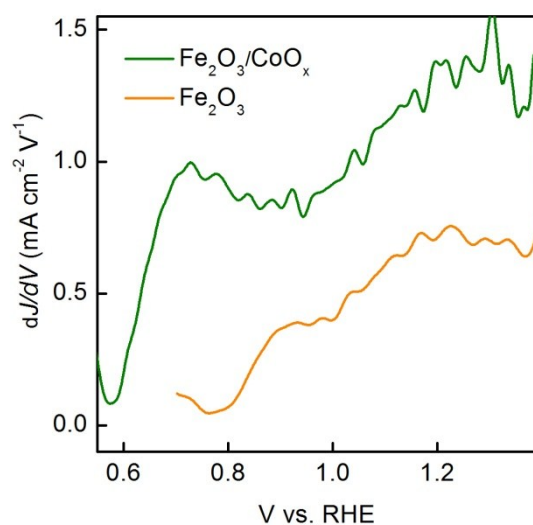

**Fig. S3.** First-order derivative of the photocurrent density as a function of voltage was calculated. The onset potential is defined as the voltage at which  $dJ/dV \geq 0.2 \text{ mA cm}^{-2} \text{ V}^{-1}$ . The onset potential was read as  $0.85 \text{ V}_{\text{RHE}}$  and  $0.60 \text{ V}_{\text{RHE}}$  for  $\text{Fe}_2\text{O}_3$  and  $\text{Fe}_2\text{O}_3/\text{CoO}_x$ , respectively.

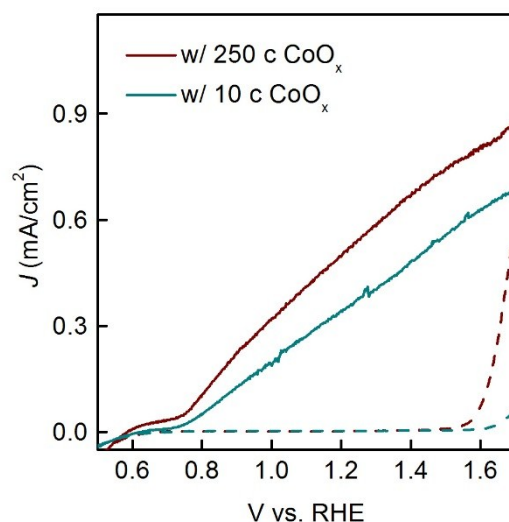

**Fig. S4.** Steady-state  $J$ - $V$  curves for hematite photanode with 10 cycles and 250 cycles of ALD  $\text{CoO}_x$  overlayer. Solid and dashed curves represent the response collected in light and dark condition respectively. Both light curves express improvement in turn on potential compared to bare hematite film.

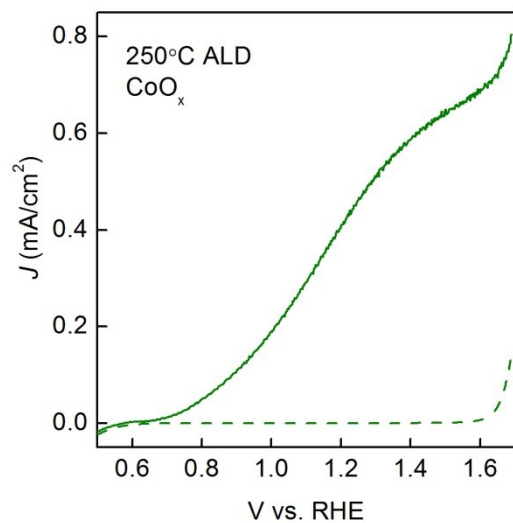

**Fig. S5.** Polarization  $J$ - $V$  curve for  $\text{CoO}_x$  coated hematite photoanode with growth temperature at 250 °C. Water oxidation turn on potential is around 0.7  $V_{\text{RHE}}$ .

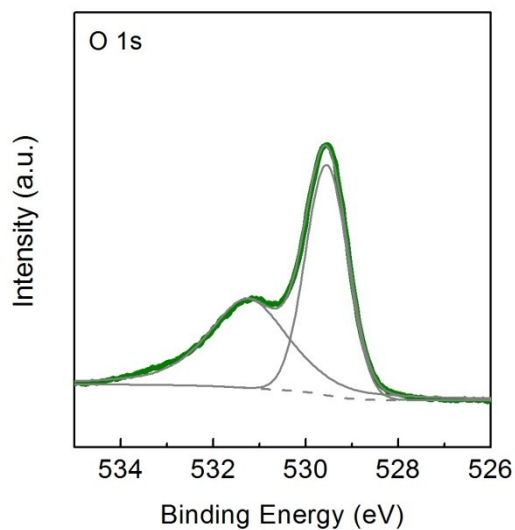

**Fig. S6.** XPS characterizations of O 1s on  $\text{CoO}_x$  coated hematite sample. Green curve is the raw data and grey lines are fitted results.

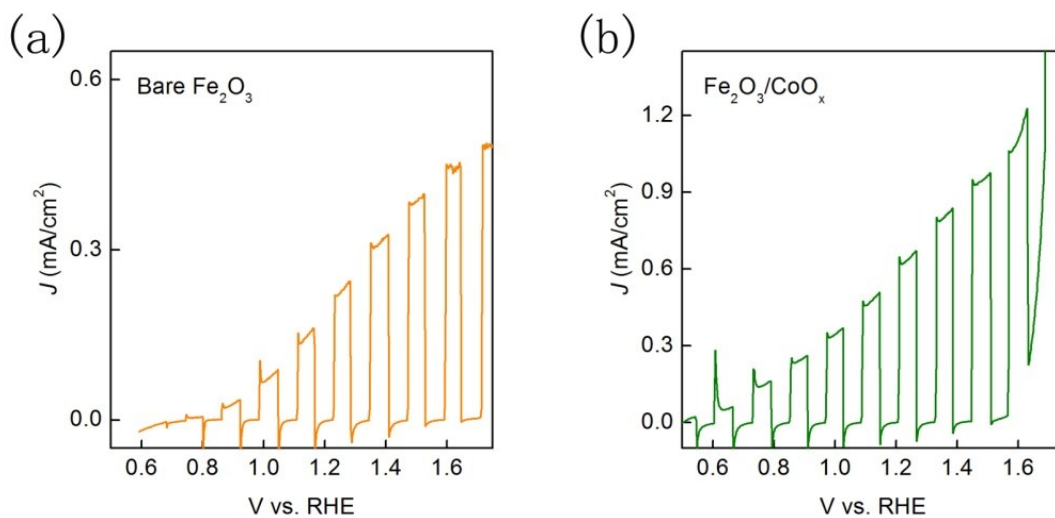

**Fig. S7.** Polarization  $J$ - $V$  curves of bare  $\text{Fe}_2\text{O}_3$  (a) and  $\text{Fe}_2\text{O}_3/\text{CoO}_x$  (b) tested in 1 M KOH, under chopped AM 1.5 illumination. Positive and negative spikes show up when light was switched on and off.

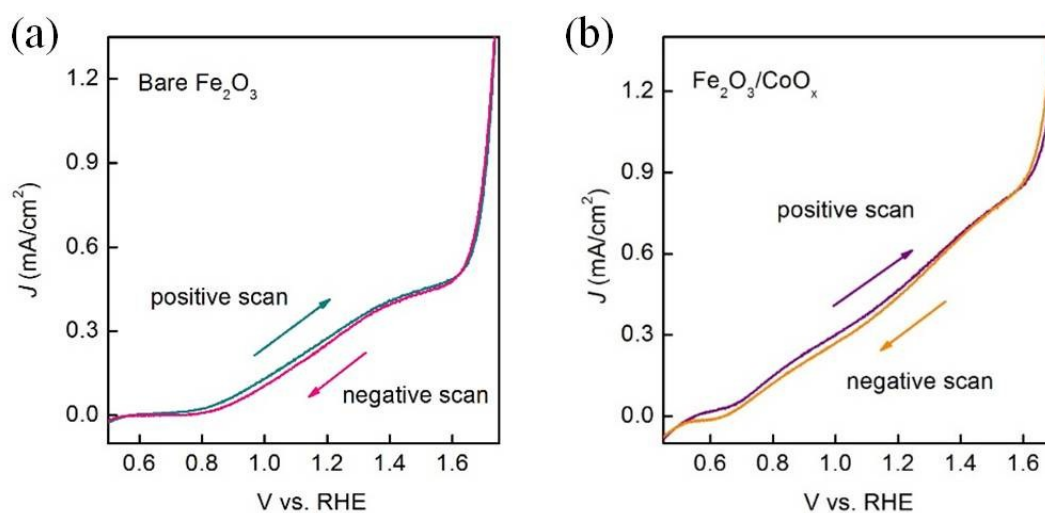

**Fig. S8.**  $J$ - $V$  curves with opposite scan directions on (a) bare (left) and (b)  $\text{CoO}_x$  coated hematite (right) photoanode. Positive scan means the applied potential start from low value, while the negative scan starts from high potential value.

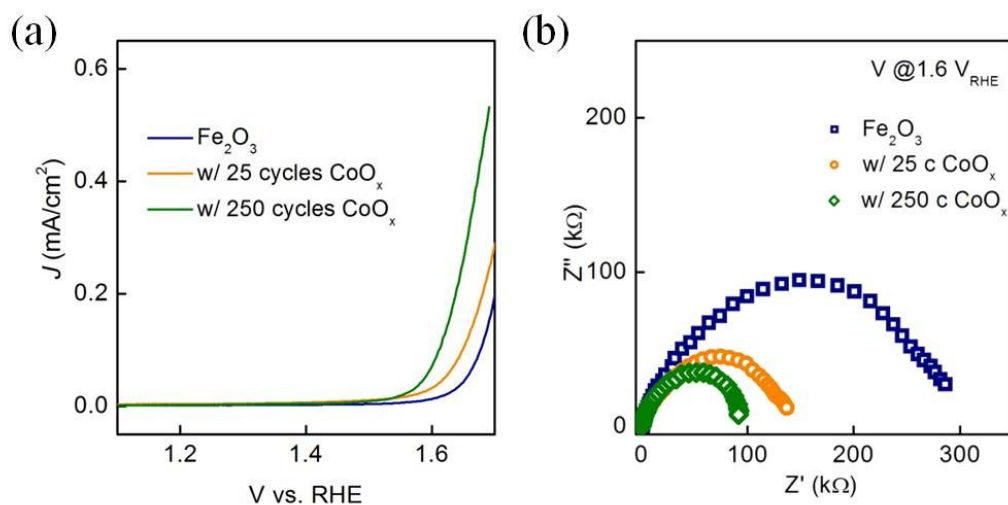

**Fig. S9.** (a) Dark  $J$ - $V$  curves on hematite with 0 , 25 and 250 cycles of ALD CoO<sub>x</sub> overlayer. Hematite with 250 cycles of ALD CoO<sub>x</sub> with the highest OER activity exhibits the earliest Von potential. (b) Representative Nyquist plot data for various hematite photoanodes collected in dark condition.

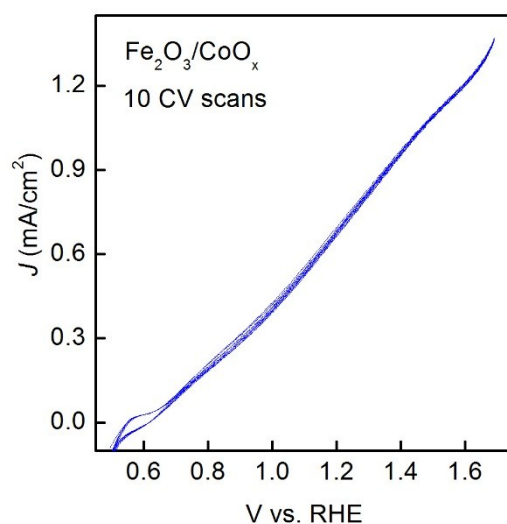

**Fig. S10.** CV scans on CoO<sub>x</sub> coated hematite photoanode. CV scan was done for 10 times with a scan rate of 10 mV/s. Negligible oxidation or reduction features are exhibited in the CV results.

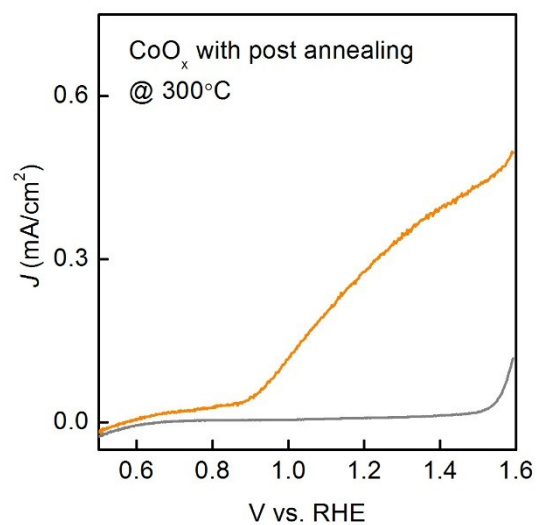

**Fig. S11.**  $J$ - $V$  curves for CoO<sub>x</sub> coated hematite photoanode with post annealing in air at 300 °C. Compared to as-prepared CoO<sub>x</sub>/Fe<sub>2</sub>O<sub>3</sub> photoanode, turn on potential shifts positively to 0.9 V<sub>RHE</sub> after thermal treatment.
